# Supplementary material for: Immune system of aquatic organisms can be affected by long-term ecological alterations? Focusing on Prophenoloxidase (proPO) and NLHS-induced proPO gene expression of Artemia Urmiana
Source: Research Square preprint supplement (doi:10.21203/rs.3.rs-7453914/v1), 2025-09-09

**Article title:** Immune system of aquatic organisms can be affected by long-term ecological alterations? Focusing on Prophenoloxidase (*proPO*) and NLHS-induced *proPO* gene expression of *Artemia Urmiana*

**Journal name:** Aquatic Ecology

**Supplementary Data** for **multiple sequence alignment**

Multiple sequence alignment of sequenced part of *Artemia urmiana* with relevant sequences of *Artemia sinica* and *Artemia franciscana*

**AM850109.1** Artemia franciscana prophenoloxidase mRNA, partial cds,

**HM138084.1** Artemia sinica prophenoloxidase (proPO) mRNA, partial cds

**OQ784174.2** Artemia urmiana prophenoloxidase (proPO) mRNA, partial cds

**CLUSTAL O(1.2.4) multiple sequence alignment**

OQ784174.2 --------------------------CAAGTAAATCAGGTATTTTCTGCACTGGATAAAA 34

AM850109.1 GTGATGAAGATGAGGAAACCGTACTTGAAATTAACCAGGAATTTTCTGCACTGGACAAAA 60

HM138084.1 -TGATGAAGATGAGGAAACCGTACTTGAAATTAACCAGGAATTTTCTGCACTGGACAAAA 59

** * ** **** *************** ****

OQ784174.2 ATCCTGAAAATCGACTAGCCTATTTCAGAGAAGATTTGGGGATAAATAGCCATCATTGGC 94

AM850109.1 ATCCTGAAAATCGACTAGCCTATTTCAGGGAAGATTTGGGAGTAAATAGCCATCATTGGC 120

HM138084.1 ATCCTGAAAATCGACTAGCCTATTTCAGGGAAGATTTGGGAGTAAATAGCCATCATTGGC 119

**************************** *********** ******************

OQ784174.2 ATTGGCACTTGGTCTTCCCTGATGATGAAGAGTTTAAACGTGACAGAAGAGGGGAGATGT 154

AM850109.1 ATTGGCACTTGGTCTTCCCAGATGATGAAGAGTTTAAGCGTGACAGAAGAGGGGAAATGT 180

HM138084.1 ATTGGCACTTGGTCTTCCCAGATGATGAAGAGTTTAAGCGTGACAGAAGAGGGGAAATGT 179

******************* ***************** ***************** ****

OQ784174.2 TCTTTTACATGCATCATCAAATTATTGCAAGATATGATTGTGAAAGACTTTCCAACGGTT 214

AM850109.1 TCTTCTATATGCATCATCAAATTATTGCAAGATATGATTGTGAAAGACTTTCCAACGGTC 240

HM138084.1 TCTTCTATATGCATCATCAAATTATTGCAAGATATGATTGTGAAAGACTTTCCAACGGTC 239

**** ** ***************************************************

OQ784174.2 TGCCGTTGGTAAGGTCATTTCATAAGCTCGACGAACCAATTGAAGAGGCATATTTCAGCA 274

AM850109.1 TACCGTTAGTAAGGTCATTTCATAAGCTTGACGAGCCAATTGAAGAAGCCTATTTCAGCA 300

HM138084.1 TACCGTTAGTAAGGTCATTTCATAAGCTTGACGAGCCAATTGAAGAAGCCTATTTCAGCA 299

* ***** ******************** ***** *********** ** **********

OQ784174.2 AACTAACAACAGATAATTCAGGAAAGCTTTGGGGTGTTCGTCCAGCTGGAATGAAAATCC 334

AM850109.1 AACTAACAACAGATAATTCAGGAAAGCTGTGGGGTGTTCGTCCTGCTGGAATGAAAATTC 360

HM138084.1 AACTAACAACAGATAATTCAGGAAAGCTGTGGGGTGTTCGTCCTGCTGGAATGAAAATTC 359

**************************** ************** ************** *

OQ784174.2 AGGATATGGAGCTACCAGAGCCCAATGAAAATTATAGAATTATGGACATGGAAGGCTGGA 394

AM850109.1 AGGATATGGAGCTACCAGAGCCCAATGAAAATTATAGAATTATGGACATGGAAGGCTGGA 420

HM138084.1 AGGATATGGAGCTACCAGAGCCCAATGAAAATTATAGAATTATGGACATGGAAGGCTGGA 419

************************************************************

OQ784174.2 GAGACAGAATAAGAGATGCTATTCATAGAGGAATTGCCAGAAAAGCTGATGGCACTGAAG 454

AM850109.1 GAGATAGAATTCGAGATGCTATTCATAGAGGAATTGCCAGAAGGACTGATGGCACTGAGG 480

HM138084.1 GAGATAGAATTCGAGATGCTATTCATAGAGGAATTGCCAGAAGGACTGATGGCACTGAGG 479

**** ***** ****************************** ************* *

OQ784174.2 TACGATTAGATGCTGAGACAGGGATTGATATCCTTGGAGATATGATTGAGCCGGCCCTTT 514

AM850109.1 TCAGATTAGATGCCAAGACAGGGATTGATATCCTTGGAGATATGATTGAGCCGGCCCTCT 540

HM138084.1 TCAGATTAGATGCCAAGACAGGGATTGATATCCTTGGAGATATGATTGAGCCGGCCCTCT 539

* ********** ******************************************* *

OQ784174.2 CTTTCTCAGTAAATCCAAGGTTTTATGGTCAGCTGCACAATAAAGGACATGTCTTGATTG 574

AM850109.1 CTTTCTCAGTAAATCCAAGATTTTACGGTCAGCTACACAATAAAGGACATGTCTTGATCG 600

HM138084.1 CTTTCTCAGTAAATCCAAGATTTTACGGTCAGCTACACAATAAAGGACATGTCTTGATCG 599

******************* ***** ******** *********************** *

OQ784174.2 GTCATTGCCACGATCCTACAGGGGCCAACAAGGAAAACGGTGGACCAATGACTGATAGTA 634

AM850109.1 GTCATTGTCACGATCCTACAGGGGCCAACAAAGAAAACGGTGGACCAATGACTGATAGTA 660

HM138084.1 GTCATTGTCACGATCCTACAGGGGCCAACAAAGAAAGCGGTGGACCAATGACTGATAGTA 659

******* *********************** **** ***********************

OQ784174.2 TGACAGCAATGAGAGATCCGATTTTCTATCGCTGGCATAAACACATCGATGAATTGTTCT 694

AM850109.1 TGACAGCAATGAGAGATCCGATTTTCTATCGCTGGCATAAGCACATCGATGAATTATTTT 720

HM138084.1 TGACAGCAATGAGAGATCCGATTTTCTATCGCTGGCATAAGCACATCGATGAATTATTTT 719

**************************************** ************** ** *

OQ784174.2 ATGAATTTAAAGAAACTTTAGGAGCGTACACAAAAGATGAGCTTGGGTTCCAAGGTATAA 754

AM850109.1 ATGAATTTAAAGAGACTTTAGGAGCGTATACGAAAGATGAGCTAGGGTTCCGAGGTATAA 780

HM138084.1 ATGAATTTAAAGAGACTTTAGGAGCGTATACGAAAGATGAGCTTGGGTTCCGAGGTATAA 779

************* ************** ** *********** ******* ********

OQ784174.2 CCCTGATGGACGTCAGCGTTAGCAATGGTAATAGGATCACTACTGGCTGGGGAAAATCCA 814

AM850109.1 CCGTCATGGACGTCAGCGTTAGCAATGGTAATAGGATCACTACTGGCTGGGGAAAATCAA 840

HM138084.1 CCGTCATGGACGTCAGCGTTAGCAATGGTAATAGGATCACTACTGGCTGGGGAAAATCAA 839

** * ***************************************************** *

OQ784174.2 GACTGAATTTAGCCCAAGGGATAGATCTCCAAGGGCGTAGAAGCGTTCAAGCTGAGCTCA 874

AM850109.1 GACTGAATTTAGCCCAAGGGATAGATCTCCAAGGGCGTAGAAACGTTCAAGCTGAGCTCA 900

HM138084.1 GACTGAATTTAGCCCAAGGGATAGATCTCCAAGGGCGTAGAAACGTTCAAGCTGAGCTCA 899

****************************************** *****************

OQ784174.2 CACATTTGGTCCACGAATCATTTGCATACCGTTTCACAGTAAGAAATGACACAAGAGCCC 934

AM850109.1 CACATTTGATCCACGAACCATTTGCATACCGTTTCACAGTGAGAAATGACACAAGAGCCC 960

HM138084.1 CACATTTGATCCACGAACCATTTGCATACCGTTTCACAGTGAGAAATGACACAAGAGCCC 959

******** ******** ********************** *******************

OQ784174.2 CAAGAAGAGTCTGTTTTCGTGTATTTATGACTCCAATATATGATGAAGTTGGAAGAAAAC 994

AM850109.1 CAAGAAGAGTTTGTTTTCGTGTATTTATGACTCCTATTTATGATGAAGTTGGAAGAAAAC 1020

HM138084.1 CAAGAAGAGTTTGTTTTCGTGTATTTATGACTCCTATTTATGATGAAGTTGGAAGAAAAC 1019

********** *********************** ** **********************

OQ784174.2 TCACATTCCGCCAGCAGACATTGCTTGCCGTGGAAATGGACAGATTTGCCGTAAATGTGA 1054

AM850109.1 TTACCTTCCGTCAGCAGACCTTGCTTGCCGTAGAAATGGACAAATTTGCCGTAACTGTGA 1080

HM138084.1 TTACCTTCCGTCAGCAGACCTTGCTTGCCGTAGAAATGGACAAATTTGCCGTAACTGTGA 1079

* ** ***** ******** *********** ********** *********** *****

OQ784174.2 ATGCCCCAATGGTTCAACTAGATCGAACATCAAGAGAGTCATCAGTAACTATTCCCCTAG 1114

AM850109.1 ATGCCCCAATGGTTCAACTAGATAGAACATCAAGAGAGTCATCAGTAACTATTCCCATAG 1140

HM138084.1 ATGCCCCAATGGTTCAACTAGATAGAACATCAAGAGAGTCATCAGTAACTATTCCCATAG 1139

*********************** ******************************** ***

OQ784174.2 AAAGGTTCTTCAGAGTTTATGAAAGAAGAACTGCAAACACTAGTGATGCCCTTTCTAACT 1174

AM850109.1 AAAGGTTCTTCAGAGTTTACGAACGAAGAACTGCAAACACGAGTGATGCCCTTTCTAACT 1200

HM138084.1 AAAGGTTCTTCAGAGTTTACGAACGAAGAACTGCAAACACGAGTGATGCCCTTTCTAACT 1199

******************* *** **************** *******************

OQ784174.2 ATGAAATGTTTTGCGGCTGCGGGTGGCCAGAGCATATGCTTGTACCGAAAGGAACAGCAG 1234

AM850109.1 ATGAAATGTTTTGCGGCTGCGGGTGGCCAGAGCATATGCTTGTACCGAAAGGATCGGCAG 1260

HM138084.1 ATGAAATGTTTTGCGGCTGTGGGTGGCCAGAGCATATGCTTGTCCCGAAAGGAACGGCAG 1259

******************* *********************** ********* * ****

OQ784174.2 AAGGGATGCAATTCGAACTGATTGTCATTGCTACTGACTGGAGTAAAGATGAGGTCCCTG 1294

AM850109.1 AAGGGATGCAATTTGAACTGATCGTCATTGCTACTGACTGGAGTAAAGACGAGGTTCCTG 1320

HM138084.1 AAGGGATGCAATTCGAACTGATTGTCATTGCTACTGACTGGAGTAAAGATGAGGTTCCTG 1319

************* ******** ************************** ***** ****

OQ784174.2 TTAGGACTGCTAATAAGCCTTGCTCTAGAGGGACGTCCTATTGTGGTGTCTTAGATGACA 1354

AM850109.1 TTAAGACTACTAACAAGCCCTGCTCTAGAGGGACGTCCTACTGCGGTGTTTTAGACGATA 1380

HM138084.1 TTAAGACTACTAATAAGCCCTGCTCTAGAGGGACGTCCTACTGCGGTGTCTTAGACGATA 1379

*** **** **** ***** ******************** ** ***** ***** ** *

OQ784174.2 AGTATCCTGAT------------------------------------- 1365

AM850109.1 AGTATCCTGATAAAAGACCCATGGGTTTCCCATTTGATCGTCCTATTG 1428

HM138084.1 AGTATCCTGATAAAAGACCCATGGGTTTCCCATTTGATCGTCCTATTG 1427

***********

**Percent Identity Matrix - created by Clustal2.1**

1: OQ784174.2 100.00 93.63 93.92

2: AM850109.1 93.63 100.00 99.30

3: HM138084.1 93.92 99.30 100.00

**Phylogenetic Tree results**

OQ784174.2:0.05877

AM850109.1:0.00497

HM138084.1:0.00204


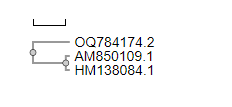

Supplement: Supplementary file 1 [file 0ea65a312db61b1b53dd819b.docx]
