# Supplementary material for: Immune system of aquatic organisms can be affected by long-term ecological alterations? Focusing on Prophenoloxidase (proPO) and NLHS-induced proPO gene expression of Artemia Urmiana
Source: Research Square preprint supplement (doi:10.21203/rs.3.rs-7453914/v1), 2025-09-09
Supplement: Supplementary file 2 [file c6809749f72b11dbfca0e830.docx]

**Article title:** Immune system of aquatic organisms can be affected by long-term ecological alterations? Focusing on Prophenoloxidase (*proPO*) and NLHS-induced *proPO* gene expression of *Artemia Urmiana*

**Journal name:** Aquatic Ecology

| **Table S1:** The results of multiple comparisons for *proPO* expression and NLHS-induced  *proPO* during the years 1994 to 2020 | | | | | |
| --- | --- | --- | --- | --- | --- |
| Tukey's multiple comparisons test | *proPO* expression over 1994 to 2020 | |  | NLHS-induced *proPO* expression over 1994 to 2020 | |
|  | 95 % CI | P Value | 95 % CI | P Value |
| 1994 vs. 2001 | -1.38668 to -0.08448 | 0.026 | | -2.381272 to -0.525901 | 0.003 |
| 1994 vs. 2003 | -1.56354 to -0.26134 | 0.007 | | -2.4259 to -0.57053 | 0.002 |
| 1994 vs. 2005 | -2.33516 to -1.03296 | 0.000 | | -3.978678 to -2.123308 | <0.0001 |
| 1994 vs. 2020 | -1.4396 to -0.1374 | 0.017 | | -4.428874 to -2.573504 | <0.0001 |
| 2001 vs. 2003 | -0.82796 to 0.474234 | 0.893 | | -0.97231 to 0.883056 | 1 |
| 2001 vs. 2005 | -1.59958 to -0.29738 | 0.005 | | -2.52509 to -0.66972 | 0.002 |
| 2001 vs. 2020 | -0.70402 to 0.598177 | 0.999 | | -2.97529 to -1.11992 | <0.0001 |
| 2003 vs. 2005 | -1.42272 to -0.12052 | 0.019 | | -2.48046 to -0.62509 | 0.002 |
| 2003 vs. 2020 | -0.52716 to 0.775042 | 0.967 | | -2.93066 to -1.07529 | <0.0001 |
| 2005 vs. 2020 | 0.244461 to 1.546658 | 0.008 | | -1.37788 to 0.477489 | 0.53 |
| Abbreviation, vs: versus, CI: confident interval, NLHS: non-lethal heat shock  p<0.05 is significant. | | | | | |
